# Supplementary material
Source: PubMed Central journal article supplement (PMC4692201)
Supplement: 10.1074_M115.679068_jbc.M115.679068-1.pdf [file 10.1074_M115.679068_jbc.M115.679068-1.pdf]

| No. | BIOCHEMICAL                         | SUPER_PATHWAY          | SUB_PATHWAY                                                  | KEGG   | Group.HMDB | T_Stat_D_V<br>s_Sham | Pval.T  | Qval.T |
|-----|-------------------------------------|------------------------|--------------------------------------------------------------|--------|------------|----------------------|---------|--------|
| 1   | kynurenate                          | Amino acid             | Tryptophan metabolism                                        | C01717 | HMDB00715  | 4.69                 | 0.00655 | 0.0204 |
| 2   | 3-phenylpropionate (hydrocinnamate) | Amino acid             | Phenylalanine & tyrosine metabolism                          | C05629 | HMDB00764  | 3.12                 | 0.01438 | 0.0324 |
| 3   | N-acetylphenylalanine               | Amino acid             | Phenylalanine & tyrosine metabolism                          | C03519 | HMDB00512  | 2.71                 | 0.02664 | 0.0491 |
| 4   | citrulline                          | Amino acid             | Urea cycle; arginine-, proline-, metabolism                  | C00327 | HMDB00904  | -2.61                | 0.03093 | 0.0533 |
| 5   | N-acetylglycine                     | Amino acid             | Glycine, serine and threonine metabolism                     |        | HMDB00532  | -2.70                | 0.02710 | 0.0491 |
| 6   | cysteine                            | Amino acid             | Cysteine, methionine, SAM, taurine metabolism                | C00097 | HMDB00574  | -2.74                | 0.04197 | 0.0657 |
| 7   | tryptophan                          | Amino acid             | Tryptophan metabolism                                        | C00078 | HMDB00929  | -2.94                | 0.02213 | 0.0426 |
| 8   | cysteine-glutathione disulfide      | Amino acid             | Glutathione metabolism                                       |        | HMDB00656  | -2.97                | 0.02230 | 0.0435 |
| 9   | 3-methyl-2-oxovalerate              | Amino acid             | Valine, leucine and isoleucine metabolism                    | C00671 | HMDB03736  | -3.29                | 0.01860 | 0.0388 |
| 10  | p-cresol sulfate                    | Amino acid             | Phenylalanine & tyrosine metabolism                          | C01468 | HMDB11635  | -3.34                | 0.01318 | 0.0306 |
| 11  | 3-(4-hydroxyphenyl)propionate       | Amino acid             | Phenylalanine & tyrosine metabolism                          | C01744 | HMDB02199  | -3.39                | 0.01635 | 0.0353 |
| 12  | hydroxyproline                      | Amino acid             | Urea cycle; arginine-, proline-, metabolism                  | C01157 | HMDB00725  | -3.81                | 0.00620 | 0.0202 |
| 13  | 4-methyl-2-oxopentanoate            | Amino acid             | Valine, leucine and isoleucine metabolism                    | C00233 | HMDB00695  | -3.86                | 0.00607 | 0.0202 |
| 14  | glutamine                           | Amino acid             | Glutamate metabolism                                         | C00064 | HMDB00641  | -3.97                | 0.00713 | 0.0214 |
| 15  | kynurenine                          | Amino acid             | Tryptophan metabolism                                        | C00328 | HMDB00684  | -4.08                | 0.00499 | 0.0196 |
| 16  | N-formylmethionine                  | Amino acid             | Cysteine, methionine, SAM, taurine metabolism                | C03145 | HMDB01015  | -4.11                | 0.00925 | 0.0253 |
| 17  | homocitrulline                      | Amino acid             | Urea cycle; arginine-, proline-, metabolism                  | C02427 | HMDB00679  | -4.84                | 0.00322 | 0.0137 |
| 18  | phenylacetyl glycine                | Amino acid             | Phenylalanine & tyrosine metabolism                          | C05598 | HMDB00821  | -5.39                | 0.00107 | 0.0086 |
| 19  | 2-oxoadipate                        | Amino acid             | Lysine metabolism                                            | C00322 | HMDB00225  | -6.80                | 0.00164 | 0.0105 |
| 20  | ribitol                             | Carbohydrate           | Nucleotide sugars, pentose metabolism                        | C00474 | HMDB00508  | -2.54                | 0.03967 | 0.0634 |
| 21  | arabinose                           | Carbohydrate           | Nucleotide sugars, pentose metabolism                        | C00216 | HMDB00646  | -2.98                | 0.02243 | 0.0435 |
| 22  | ribose                              | Carbohydrate           | Nucleotide sugars, pentose metabolism                        | C00121 | HMDB00283  | -4.24                | 0.00287 | 0.0133 |
| 23  | mannose                             | Carbohydrate           | Fructose, mannose, galactose, starch, and sucrose metabolism | C00159 | HMDB00169  | -4.37                | 0.00278 | 0.0133 |
| 24  | trigonelline (N'-methylnicotinate)  | Cofactors and vitamins | Nicotinate and nicotinamide metabolism                       | C01004 | HMDB00875  | 5.64                 | 0.00052 | 0.0060 |
| 25  | alpha-ketoglutarate                 | Energy                 | Krebs cycle                                                  | C00026 | HMDB00208  | -2.86                | 0.02580 | 0.0485 |
| 26  | citrate                             | Energy                 | Krebs cycle                                                  | C00158 | HMDB00094  | -3.46                | 0.01554 | 0.0345 |
| 27  | caprate (10:0)                      | Lipid                  | Medium chain fatty acid                                      | C01571 | HMDB00511  | 6.93                 | 0.00012 | 0.0033 |
| 28  | pinitol                             | Lipid                  | Inositol metabolism                                          | C03844 |            | 5.50                 | 0.00161 | 0.0105 |
| 29  | 12-HETE                             | Lipid                  | Eicosanoid                                                   |        | HMDB06111  | 3.10                 | 0.01874 | 0.0388 |
| 30  | sebacate (decanedioate)             | Lipid                  | Fatty acid, dicarboxylate                                    | C08277 | HMDB00792  | 3.04                 | 0.02719 | 0.0491 |
| 31  | myristoleate (14:1n5)               | Lipid                  | Long chain fatty acid                                        | C08322 | HMDB02000  | -2.46                | 0.03928 | 0.0634 |
| 32  | stearate (18:0)                     | Lipid                  | Long chain fatty acid                                        | C01530 | HMDB00827  | -2.60                | 0.03464 | 0.0577 |
| 33  | palmitate (16:0)                    | Lipid                  | Long chain fatty acid                                        | C00249 | HMDB00220  | -2.62                | 0.03408 | 0.0574 |
| 34  | azelate (nonanedioate; C9)          | Lipid                  | Fatty acid, dicarboxylate                                    | C08261 | HMDB00784  | -2.69                | 0.02753 | 0.0491 |
| 35  | 1-heptadecanoyl-GPC (17:0)          | Lipid                  | Lysolipid                                                    |        | HMDB12108  | -2.70                | 0.02861 | 0.0504 |
| 36  | 3-hydroxydecanoate                  | Lipid                  | Fatty acid, monohydroxy                                      |        | HMDB02203  | -2.74                | 0.04495 | 0.0689 |
| 37  | myristate (14:0)                    | Lipid                  | Long chain fatty acid                                        | C06424 | HMDB00806  | -2.89                | 0.02596 | 0.0485 |
| 38  | hexanoylglycine (C6)                | Lipid                  | Fatty acid metabolism                                        |        | HMDB00701  | -2.92                | 0.02179 | 0.0434 |
| 39  | 2-hydroxystearate                   | Lipid                  | Fatty acid, monohydroxy                                      | C03045 |            | -2.95                | 0.03560 | 0.0587 |
| 40  | 1-palmitoylplasmenylethanolamine*   | Lipid                  | Lysolipid                                                    |        |            | -3.06                | 0.01763 | 0.0375 |
| 41  | carnitine                           | Lipid                  | Carnitine metabolism                                         | C00318 |            | -3.16                | 0.01410 | 0.0323 |
| 42  | stearidonate (18:4n3)               | Lipid                  | Long chain fatty acid                                        | C16300 | HMDB06547  | -3.27                | 0.01170 | 0.0285 |
| 43  | palmitoylcarnitine (C16)            | Lipid                  | Carnitine metabolism                                         | C02990 | HMDB00222  | -3.32                | 0.01067 | 0.0271 |
| 44  | hexanoylcarnitine (C6)              | Lipid                  | Carnitine metabolism                                         |        | HMDB00705  | -3.41                | 0.00923 | 0.0253 |
| 45  | 2-docosahexaenoyl-GPC* (22:6)*      | Lipid                  | Lysolipid                                                    |        |            | -3.42                | 0.01587 | 0.0348 |
| 46  | 1-oleoyl-GPC (18:1)                 | Lipid                  | Lysolipid                                                    |        |            | -3.68                | 0.00665 | 0.0204 |
| 47  | campesterol                         | Lipid                  | Sterol/Steroid                                               | C01789 | HMDB02869  | -3.69                | 0.00909 | 0.0253 |
| 48  | 2-hydroxypalmitate                  | Lipid                  | Fatty acid, monohydroxy                                      |        |            | -3.73                | 0.01030 | 0.0268 |
| 49  | 2-arachidonoyl-GPC* (20:4)*         | Lipid                  | Lysolipid                                                    |        |            | -3.86                | 0.00568 | 0.0200 |
| 50  | oleate (18:1n9)                     | Lipid                  | Long chain fatty acid                                        | C00712 | HMDB00207  | -3.88                | 0.00500 | 0.0196 |
| 51  | hydroxybutyrylcarnitine*            | Lipid                  | Fatty acid metabolism (also BCAA metabolism)                 |        | HMDB13127  | -3.90                | 0.00809 | 0.0239 |
| 52  | arachidonate (20:4n6)               | Lipid                  | Long chain fatty acid                                        | C00219 | HMDB01043  | -3.97                | 0.00641 | 0.0204 |
| 53  | docosapentaenoate (n6 DPA; 22:5n6)  | Lipid                  | Essential fatty acid                                         | C16513 | HMDB13123  | -3.97                | 0.00562 | 0.0200 |
| 54  | 1-linoleoyl-GPC (18:2)              | Lipid                  | Lysolipid                                                    | C04100 |            | -4.02                | 0.01114 | 0.0275 |
| 55  | deoxycarnitine                      | Lipid                  | Carnitine metabolism                                         | C01181 | HMDB01161  | -4.06                | 0.00870 | 0.0252 |
| 56  | 2-palmitoyl-GPE* (16:0)*            | Lipid                  | Lysolipid                                                    |        |            | -4.13                | 0.00959 | 0.0258 |
| 57  | oleoylcarnitine (C18)               | Lipid                  | Carnitine metabolism                                         |        | HMDB05065  | -4.40                | 0.00311 | 0.0136 |
| 58  | 1-arachidonoyl-GPC* (20:4)*         | Lipid                  | Lysolipid                                                    | C05208 |            | -4.48                | 0.00266 | 0.0133 |
| 59  | 1-linoleoyl-GPI* (18:2)*            | Lipid                  | Lysolipid                                                    |        |            | -4.56                | 0.00186 | 0.0110 |
| 60  | 3-hydroxyoctanoate                  | Lipid                  | Fatty acid, monohydroxy                                      |        | HMDB01954  | -4.61                | 0.00175 | 0.0107 |
| 61  | 1-myristoyl-GPC (14:0)              | Lipid                  | Lysolipid                                                    |        | HMDB10379  | -4.61                | 0.00574 | 0.0200 |
| 62  | hexadecanedioate (C16)              | Lipid                  | Fatty acid, dicarboxylate                                    |        | HMDB00672  | -4.83                | 0.00198 | 0.0112 |
| 63  | 1-palmitoleoyl-GPC* (16:1)*         | Lipid                  | Lysolipid                                                    |        |            | -4.91                | 0.00118 | 0.0088 |
| 64  | 1-palmitoyl-GPE (16:0)              | Lipid                  | Lysolipid                                                    |        | HMDB11503  | -4.93                | 0.00535 | 0.0200 |
| 65  | octadecanedioate (C18)              | Lipid                  | Fatty acid, dicarboxylate                                    |        | HMDB00782  | -5.09                | 0.00256 | 0.0133 |
| 66  | 10-heptadecenoate (17:1n7)          | Lipid                  | Long chain fatty acid                                        |        |            | -5.10                | 0.00129 | 0.0090 |
| 67  | dihomolinoleate (20:2n6)            | Lipid                  | Long chain fatty acid                                        | C16525 |            | -5.20                | 0.00083 | 0.0075 |
| 68  | octanoylcarnitine (C8)              | Lipid                  | Carnitine metabolism                                         | C02838 | HMDB00791  | -5.45                | 0.00094 | 0.0080 |
| 69  | margarate (17:0)                    | Lipid                  | Long chain fatty acid                                        |        | HMDB02259  | -5.46                | 0.00070 | 0.0067 |
| 70  | 1-arachidonoyl-GPI* (20:4)*         | Lipid                  | Lysolipid                                                    |        |            | -5.57                | 0.00054 | 0.0060 |
| 71  | 1-stearoyl-GPI (18:0)               | Lipid                  | Lysolipid                                                    |        |            | -5.64                | 0.00064 | 0.0065 |
| 72  | 10-nonadecenoate (19:1n9)           | Lipid                  | Long chain fatty acid                                        |        |            | -5.98                | 0.00121 | 0.0088 |
| 73  | 1-eicosatrienoyl-GPC* (20:3)*       | Lipid                  | Lysolipid                                                    |        |            | -6.86                | 0.00015 | 0.0033 |
| 74  | eicosapentaenoate (EPA; 20:5n3)     | Lipid                  | Essential fatty acid                                         | C06428 | HMDB01999  | -7.00                | 0.00013 | 0.0033 |
| 75  | docosapentaenoate (DPA; 22:5n3)     | Lipid                  | Essential fatty acid                                         | C16513 | HMDB01976  | -7.04                | 0.00026 | 0.0039 |
| 76  | acetylcarnitine (C2)                | Lipid                  | Carnitine metabolism                                         | C02571 | HMDB00201  | -7.12                | 0.00022 | 0.0037 |
| 77  | 1-docosahexaenoyl-GPC* (22:6)*      | Lipid                  | Lysolipid                                                    |        |            | -7.13                | 0.00020 | 0.0037 |
| 78  | dihomolinolenate (20:3n3 or 3n6)    | Lipid                  | Essential fatty acid                                         | C03242 | HMDB02925  | -7.77                | 0.00052 | 0.0060 |
| 79  | mead acid (20:3n9)                  | Lipid                  | Long chain fatty acid                                        |        | HMDB10378  | -7.88                | 0.00006 | 0.0029 |

|     |                                |             |                                            |        |           |        |         |        |
|-----|--------------------------------|-------------|--------------------------------------------|--------|-----------|--------|---------|--------|
| 80  | 1-arachidonoyl-GPE* (20:4)*    | Lipid       | Lysolipid                                  |        | HMDB11517 | -8.22  | 0.00004 | 0.0029 |
| 81  | docosahexaenoate (DHA; 22:6n3) | Lipid       | Essential fatty acid                       | C06429 | HMDB02183 | -8.28  | 0.00032 | 0.0045 |
| 82  | 1-oleoyl-GPE (18:1)            | Lipid       | Lysolipid                                  |        | HMDB11506 | -11.91 | 0.00001 | 0.0016 |
| 83  | uracil                         | Nucleotide  | Pyrimidine metabolism, uracil containing   | C00106 | HMDB00300 | 3.43   | 0.01295 | 0.0306 |
| 84  | cytidine                       | Nucleotide  | Pyrimidine metabolism, cytidine containing | C00475 | HMDB00089 | -2.75  | 0.04293 | 0.0665 |
| 85  | pseudouridine                  | Nucleotide  | Pyrimidine metabolism, uracil containing   | C02067 | HMDB00767 | -2.87  | 0.03359 | 0.0572 |
| 86  | allantoin                      | Nucleotide  | Purine metabolism, urate metabolism        | C02350 | HMDB00462 | -3.04  | 0.03019 | 0.0526 |
| 87  | TDTEDKGEFLSEGGGV*              | Peptide     | Fibrinogen cleavage peptide                |        |           | 2.43   | 0.04181 | 0.0657 |
| 88  | alanylalanine                  | Peptide     | Dipeptide                                  | C00993 | HMDB03459 | -2.87  | 0.02500 | 0.0479 |
| 89  | gamma-glutamylmethionine       | Peptide     | gamma-glutamyl                             |        |           | -3.42  | 0.01003 | 0.0265 |
| 90  | gamma-glutamylvaline           | Peptide     | gamma-glutamyl                             |        | HMDB11172 | -3.82  | 0.00552 | 0.0200 |
| 91  | gamma-glutamylleucine          | Peptide     | gamma-glutamyl                             |        | HMDB11171 | -3.88  | 0.00484 | 0.0196 |
| 92  | gamma-glutamylisoleucine*      | Peptide     | gamma-glutamyl                             |        | HMDB11170 | -4.07  | 0.01202 | 0.0288 |
| 93  | carnosine                      | Peptide     | Dipeptide derivative                       | C00386 | HMDB00033 | -4.24  | 0.01077 | 0.0271 |
| 94  | gamma-glutamylglutamine        | Peptide     | gamma-glutamyl                             |        | HMDB11738 | -4.62  | 0.00277 | 0.0133 |
| 95  | prolylhydroxyproline           | Peptide     | Dipeptide                                  |        | HMDB06695 | -8.23  | 0.00010 | 0.0033 |
| 96  | hippurate                      | Xenobiotics | Benzoate metabolism                        | C01586 | HMDB00714 | 3.94   | 0.00601 | 0.0202 |
| 97  | catechol sulfate               | Xenobiotics | Benzoate metabolism                        | C00090 |           | 2.89   | 0.02046 | 0.0418 |
| 98  | EDTA                           | Xenobiotics | EDTA                                       | C00284 |           | 2.59   | 0.03770 | 0.0615 |
| 99  | ethyl glucuronide              | Xenobiotics | Detoxification metabolism                  |        |           | -4.49  | 0.00211 | 0.0116 |
| 100 | ergothioneine                  | Xenobiotics | Food component/Plant                       | C05570 | HMDB03045 | -4.84  | 0.00308 | 0.0136 |
